# Supplementary material for: Standardised 3D-CT Lung Volumes for Patients with Idiopathic Pulmonary Fibrosis
Source: Research Square preprint supplement (doi:10.21203/rs.3.rs-1129054/v1), 2021-12-03
Supplement: Supplementary file 1 [file a737323cfb86ea8794ade92c.docx]

# Standardised 3D-CT lung volumes for patients with idiopathic pulmonary fibrosis

Yuko Tanaka, M.D. 1, Yuzo Suzuki, M.D., Ph.D.1, Atsuki Fukada, M.D. 1, Yusuke Inoue, M.D., PhD1, Hironao Hozumi, M.D., Ph.D.1, Masato Karayama, M.D., Ph.D.1, Kazuki Furuhashi, M.D., Ph.D.1, Noriyuki Enomoto, M.D., Ph.D.1, Tomoyuki Fujisawa, M.D., Ph.D.1, Yutaro Nakamura, M.D., Ph.D.1, Naoki Inui, M.D., Ph.D.1, Takafumi Suda, M.D., Ph.D.1

1Second Division, Department of Internal Medicine, Hamamatsu University School of Medicine, Hamamatsu, Japan

**Corresponding author:** Yuzo Suzuki, M.D., Ph.D.

**Address:** 1-20-1 Handayama Higashi-ku, Hamamatsu, Shizuoka 431-3192 Japan

**Tel:** +81-53-435-2263 **Fax:** +81-53-435-2354

**E-mail:** yuzosuzu@hama-med.ac.jp

## METHODS

##### Patients

The data of 190 consecutive patients with IPF who were admitted to the Hamamatsu University School of Medicine Hospital from January 2007 to July 2020 were retrospectively reviewed. Overall, 50 patients were excluded from this study, including 33 who underwent CT with a slice thickness >5 mm, 11 who had a history of lung resection or concomitant malignancy, and six who had insufficient clinical data regarding PFTs. Therefore, 140 patients with IPF were enrolled in this study, and 61 AEs occurred in 47 patients. To validate values of standardised 3D-CT LVs, another set of consecutive cohort patients with AE-IPF (n=50) from Seirei-Mikatahara hospital were also enrolled. A total of 140 chest CTs obtained at the time of IPF diagnosis and 61 obtained during AE were analysed (**Supplementary** **Figure 1**). IPF was diagnosed based on the ATS/ERS/JRS/LATA criteria 1-3, and AEs were diagnosed based on the ATS guidelines 4, 5. Fifty-three age- and sex-matched controls were also included in the study.

This study was approved by the Ethical Committee of Hamamatsu University School of Medicine (20-270) and was conducted in accordance with approved guidelines. The requirement of informed consent was waived due to the retrospective nature of the study.

##### Quantification and standardisation of 3D-CT LVs

Chest CT images obtained at the time of IPF diagnosis and AE were retrieved from electronic medical records. All CT images were obtained for diagnostic purposes during routine clinical practice. The chest CT scans were performed without intravenous contrast with the patient in the supine position. Patients were instructed to maintain full inspiration without coughing. SOMATOM Definition Flash (Siemens Healthcare, Tokyo, Japan) and Aquillion CX (CANON medical, Tokyo, Japan) CT scanners were used. The settings of the CT machine were as follows: detector-row configuration acquired as 128 x 0.6 mm (SOMATOM) and 64 x 0.5 mm (Aquillion CX) by double sampling, 120 kVp, and quality mAs via AEC. A sharp kernel of I70 (SOMATOM) and FC52 (Aquillion CX) were used to create 3D-CT images using 5-mm slices at 5-mm intervals in the lung parenchyma (window level: −600 HU; window width: 1500 HU). SYNAPSE VINCENT version 3 software (Fujifilm Medical Systems, Tokyo, Japan) was used to extract the lung fields from CT images, perform lung lobe segmentation, and analyse each LV (total lung, right lung, right upper lobe, right middle lobe, right lower lobe, left lung, left upper lobe, and left lower lobe). Digital imaging and communications in medicine data for each patient were transferred to the software anonymously. Using this software, whole lung extraction from chest CT imaging was automatically quantified by excluding the thoracic wall, mediastinum, large vessels, and airways toward the tertiary bronchi. Lung extraction and lung lobe segmentation were performed using both threshold values and anatomical knowledge-based algorithms. CT values for the whole lung were defined as between -1000 HU and 0 HU. The automatic lung extraction was checked by a respiratory physician with eight years of experience (YT). In addition, a threshold-based volumetric CT analysis, in which threshold CT values can be flexibly determined by all users, was used. When the software failed to segment the lung or lung lobe, the respiratory physician manually segmented the lung or lung lobe to correct the problem and a respiratory specialist with 20 years of experience (YS) confirmed the accuracy of the segmentation results. The standardised 3D-CT LV (%) was calculated by dividing by the 3D-CT LV by the predicted forced vital capacity (FVC-predicted).

##### Data collection

Clinical characteristics at the time of IPF diagnosis (age, sex, physical examination, smoking history, blood test results, and PFT results) were retrieved from the patients’ medical records. Clinical data recorded at the time of AE were also retrieved.

##### The Gender-Age-Physiology (GAP) index

The Gender-Age-Physiology (GAP) index was calculated based on data at the time of IPF diagnosis, as previously described6: sex (female, 0 points; male, 1 point), age (≤60 years , 0 points; 61–65 years, 1 point; >65 years, 2 points), FVC (%) (>75%, 0 points; 50 %–75%, 1 point; <50%, 2 points), and %DLCO (>55%, 0 points; 36%–55%, 1 point; ≤35%, 2 points; cannot perform, 3 points). The GAP index was defined based on the total GAP score: stage I (0–3 points), stage II (4–5 points), and stage III (6–8 points). The modified GAP index was also evaluated using the standardised 3D-CT LV (%) in place of the FVC (%). Standardised 3D-CT LVs (%) corresponding to FVCs (%) were determined using correlation analyses and used to calculate the modified GAP index.


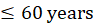

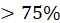

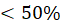

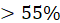

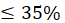


1 Raghu G, Collard HR, Egan JJ, Martinez FJ, Behr J, Brown KK, Colby TV, Cordier JF, Flaherty KR, Lasky JA, Lynch DA, Ryu JH, Swigris JJ, Wells AU, Ancochea J, Bouros D, Carvalho C, Costabel U, Ebina M, Hansell DM, Johkoh T, Kim DS, King TE, Jr., Kondoh Y, Myers J, Muller NL, Nicholson AG, Richeldi L, Selman M, Dudden RF, Griss BS, Protzko SL, Schunemann HJ, Fibrosis AEJACoIP. An official ATS/ERS/JRS/ALAT statement: idiopathic pulmonary fibrosis: evidence-based guidelines for diagnosis and management. Am J Respir Crit Care Med. 2011; **183**: 788-824.

2 Raghu G, Remy-Jardin M, Myers JL, Richeldi L, Ryerson CJ, Lederer DJ, Behr J, Cottin V, Danoff SK, Morell F, Flaherty KR, Wells A, Martinez FJ, Azuma A, Bice TJ, Bouros D, Brown KK, Collard HR, Duggal A, Galvin L, Inoue Y, Jenkins RG, Johkoh T, Kazerooni EA, Kitaichi M, Knight SL, Mansour G, Nicholson AG, Pipavath SNJ, Buendia-Roldan I, Selman M, Travis WD, Walsh S, Wilson KC, American Thoracic Society ERSJRS, Latin American Thoracic S. Diagnosis of Idiopathic Pulmonary Fibrosis. An Official ATS/ERS/JRS/ALAT Clinical Practice Guideline. Am J Respir Crit Care Med. 2018; **198**: e44-e68.

3 Raghu G, Rochwerg B, Zhang Y, Garcia CA, Azuma A, Behr J, Brozek JL, Collard HR, Cunningham W, Homma S, Johkoh T, Martinez FJ, Myers J, Protzko SL, Richeldi L, Rind D, Selman M, Theodore A, Wells AU, Hoogsteden H, Schunemann HJ, American Thoracic S, European Respiratory s, Japanese Respiratory S, Latin American Thoracic A. An Official ATS/ERS/JRS/ALAT Clinical Practice Guideline: Treatment of Idiopathic Pulmonary Fibrosis. An Update of the 2011 Clinical Practice Guideline. Am J Respir Crit Care Med. 2015; **192**: e3-19.

4 Collard HR, Moore BB, Flaherty KR, Brown KK, Kaner RJ, King TE, Jr., Lasky JA, Loyd JE, Noth I, Olman MA, Raghu G, Roman J, Ryu JH, Zisman DA, Hunninghake GW, Colby TV, Egan JJ, Hansell DM, Johkoh T, Kaminski N, Kim DS, Kondoh Y, Lynch DA, Muller-Quernheim J, Myers JL, Nicholson AG, Selman M, Toews GB, Wells AU, Martinez FJ, Idiopathic Pulmonary Fibrosis Clinical Research Network I. Acute exacerbations of idiopathic pulmonary fibrosis. Am J Respir Crit Care Med. 2007; **176**: 636-43.

5 Collard HR, Richeldi L, Kim DS, Taniguchi H, Tschoepe I, Luisetti M, Roman J, Tino G, Schlenker-Herceg R, Hallmann C, du Bois RM. Acute exacerbations in the INPULSIS trials of nintedanib in idiopathic pulmonary fibrosis. Eur Respir J. 2017; **49**.

6 Ley B, Ryerson CJ, Vittinghoff E, Ryu JH, Tomassetti S, Lee JS, Poletti V, Buccioli M, Elicker BM, Jones KD, King TE, Jr., Collard HR. A multidimensional index and staging system for idiopathic pulmonary fibrosis. Annals of internal medicine. 2012; **156**: 684-91.
